# Supplementary material for: Fluorescent carbon nanoparticles derived from natural materials of mango fruit for bio-imaging probes
Source: Royal Society of Chemistry journal article supplement (doi:10.1039/c4nr04805a), 2014-10-22
Supplement: c4nr04805a1.pdf [file c4nr04805a1.pdf]

Electronic Supplementary Information (ESI)

**Fluorescence Carbon Nanoparticles Derived from Natural  
Material of Mango Fruit for Bio-imaging Probes**

Chan Jin Jeong,<sup>a</sup> Arup Kumer Roy,<sup>b</sup> Sung Han Kim,<sup>d</sup> Jung-Eun Lee,<sup>c</sup> Ji Hoon Jeong,<sup>c</sup> Insik  
In<sup>\*a,b</sup> and Sung Young Park<sup>\*a,d</sup>

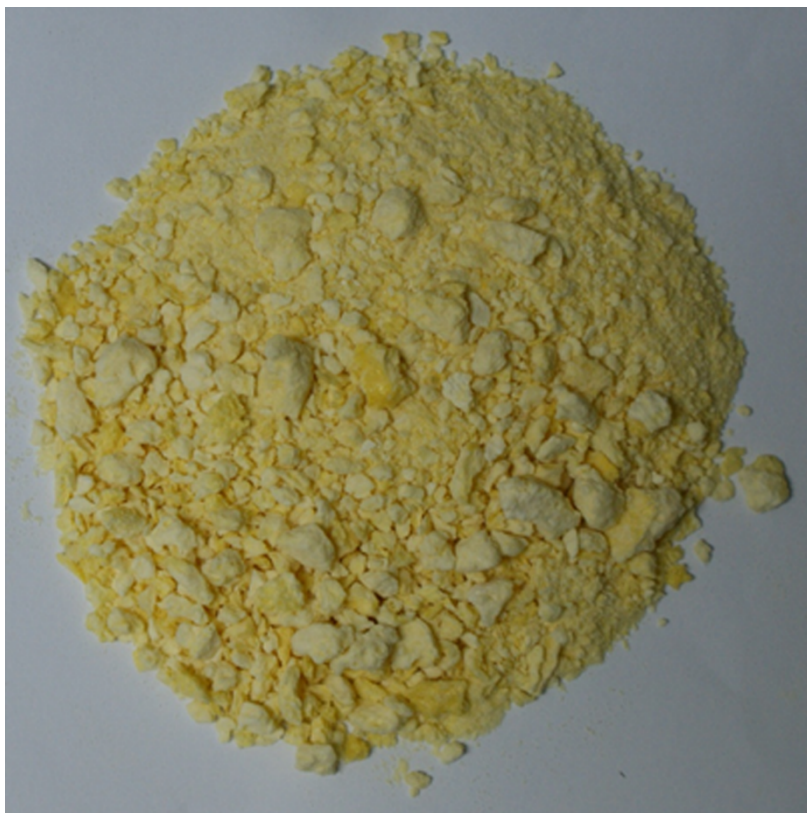

**Fig. S1** Freeze dried mango fruit powder (starting material).

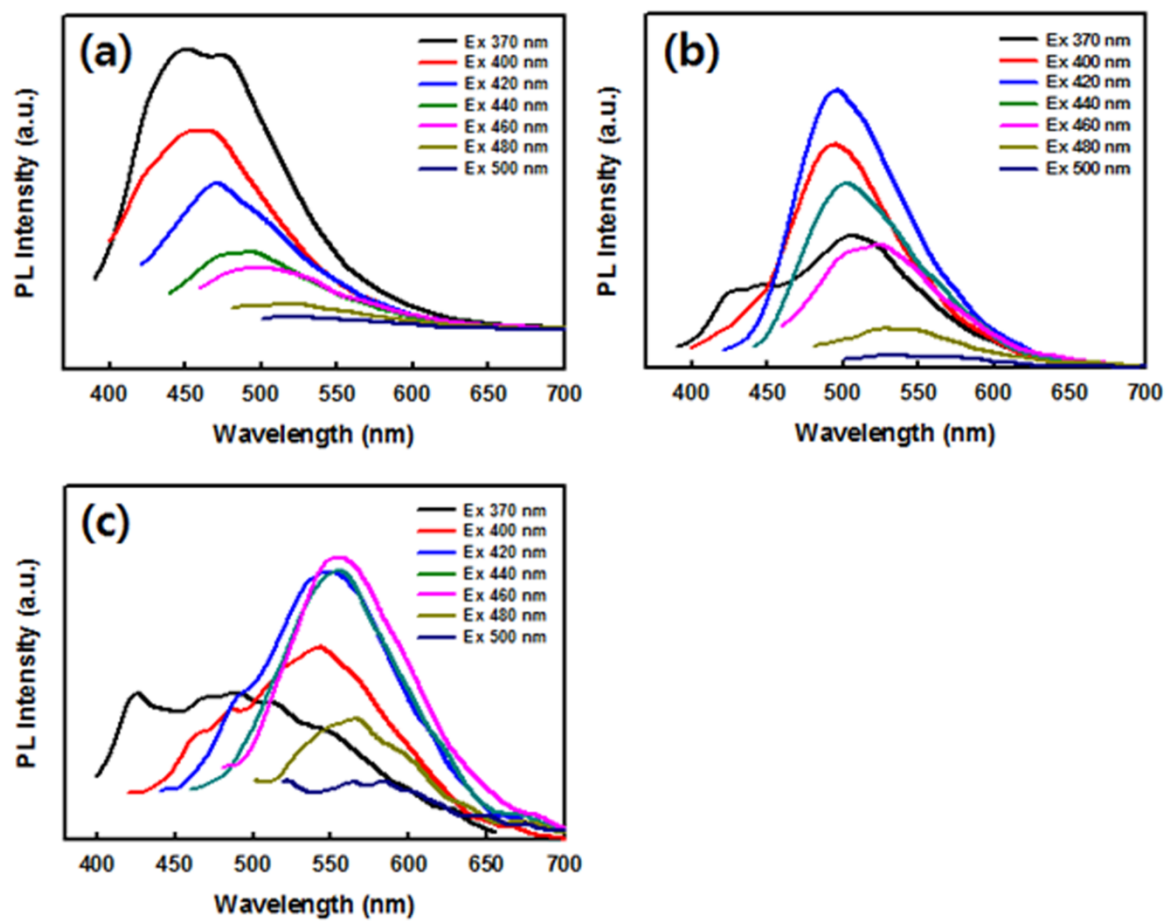

**Fig. S2** Fluorescence emission spectra of (a) FCP-B, (b) FCP-G and (c) FCP-Y at different excitation wavelengths.

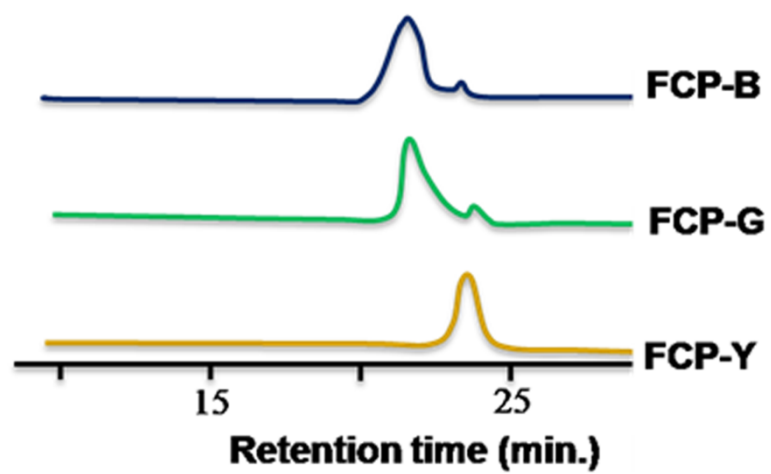

**Fig. S3** Gel permeation chromatography (GPC) retention time (min) of FCP-B, FCP-G and FCP-Y, respectively.

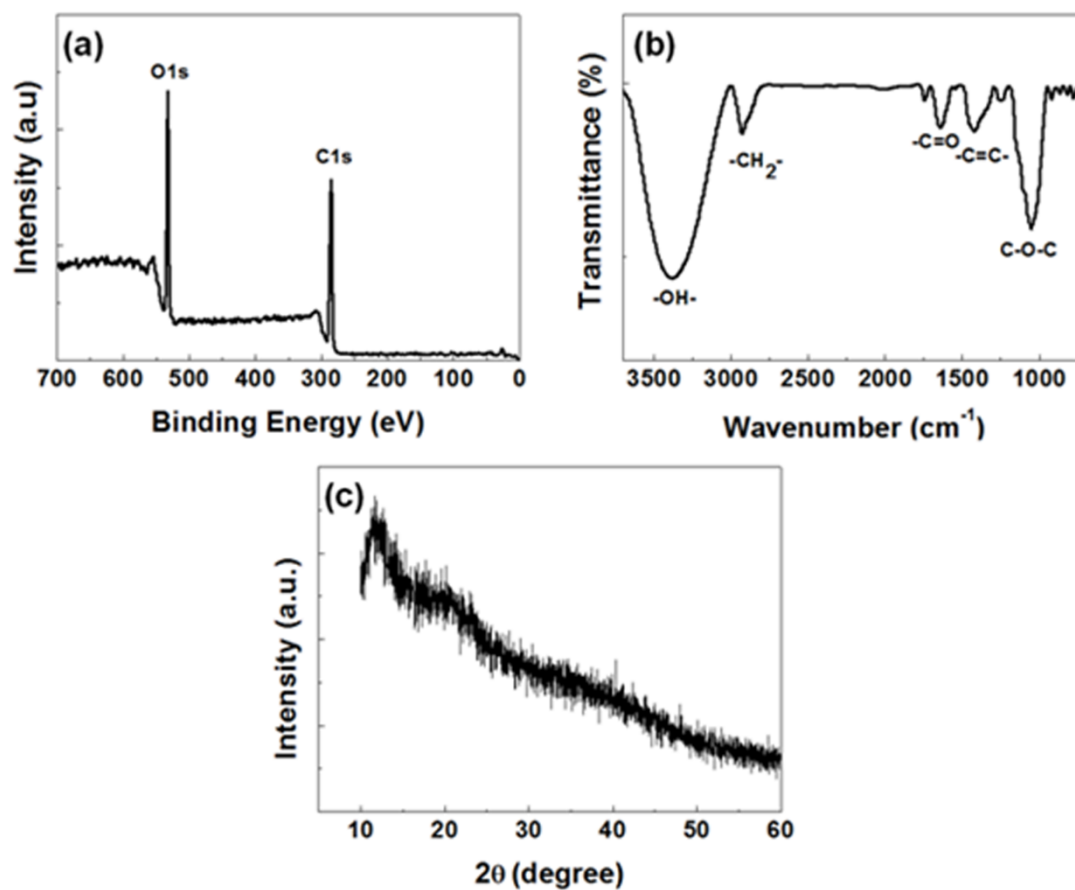

**Fig. S4** XPS survey scans (a), FT-IR (b), and XRD patterns (c) of the freeze dried mango fruit powder (starting material, mango fruit).

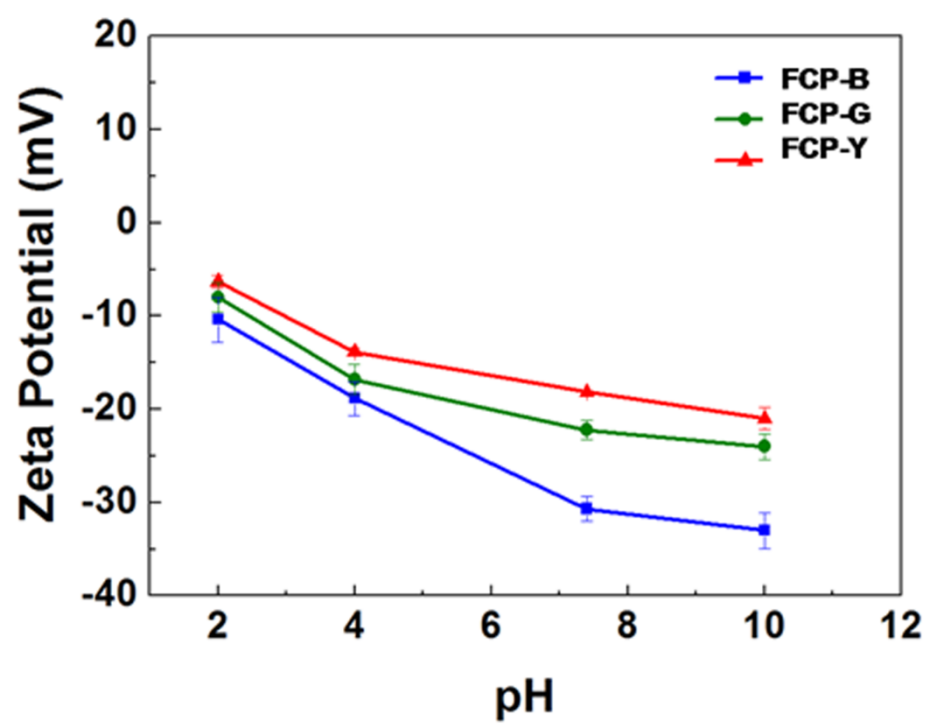

Fig. S5 pH-dependent zeta potential of FCP-B, FCP-G and FCP-Y.

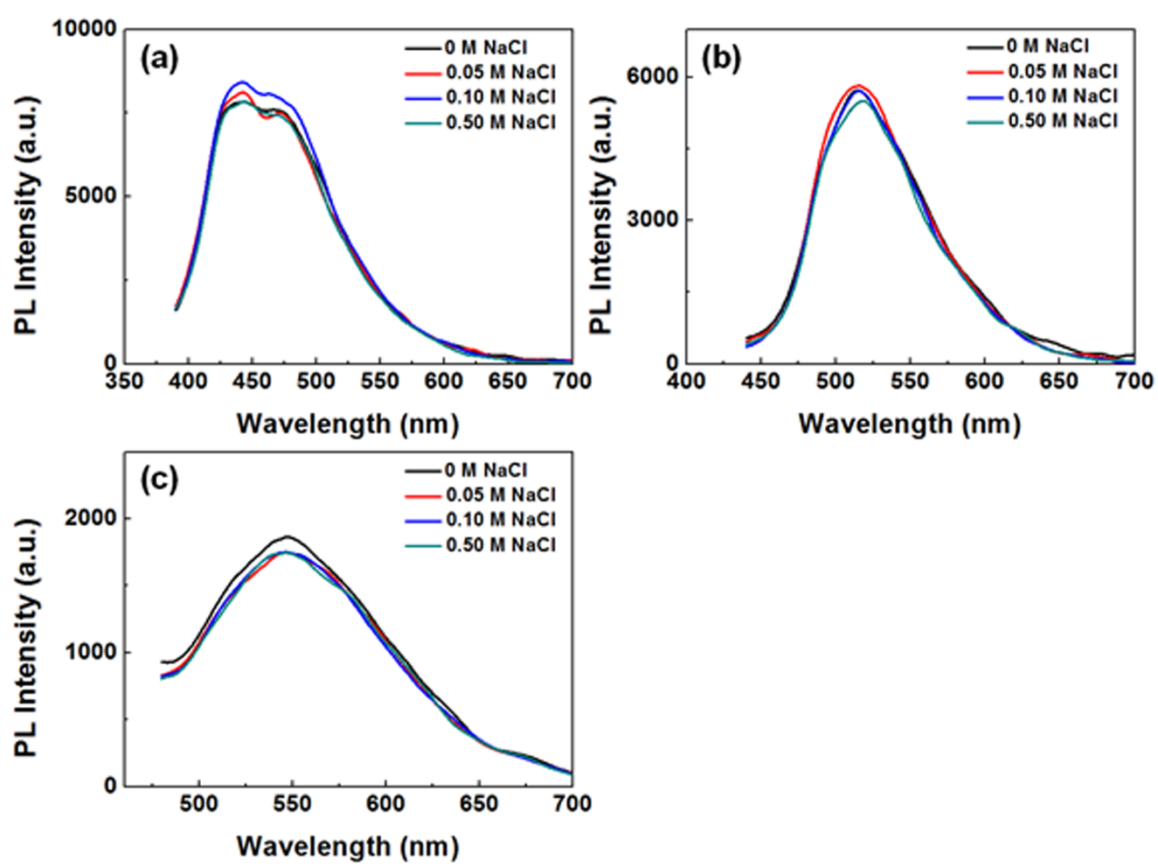

**Fig. S6** Fluorescence emission spectra of (a) FCP-B, (b) FCP-G and (c) FCP-Y at different concentrations of NaCl solution.

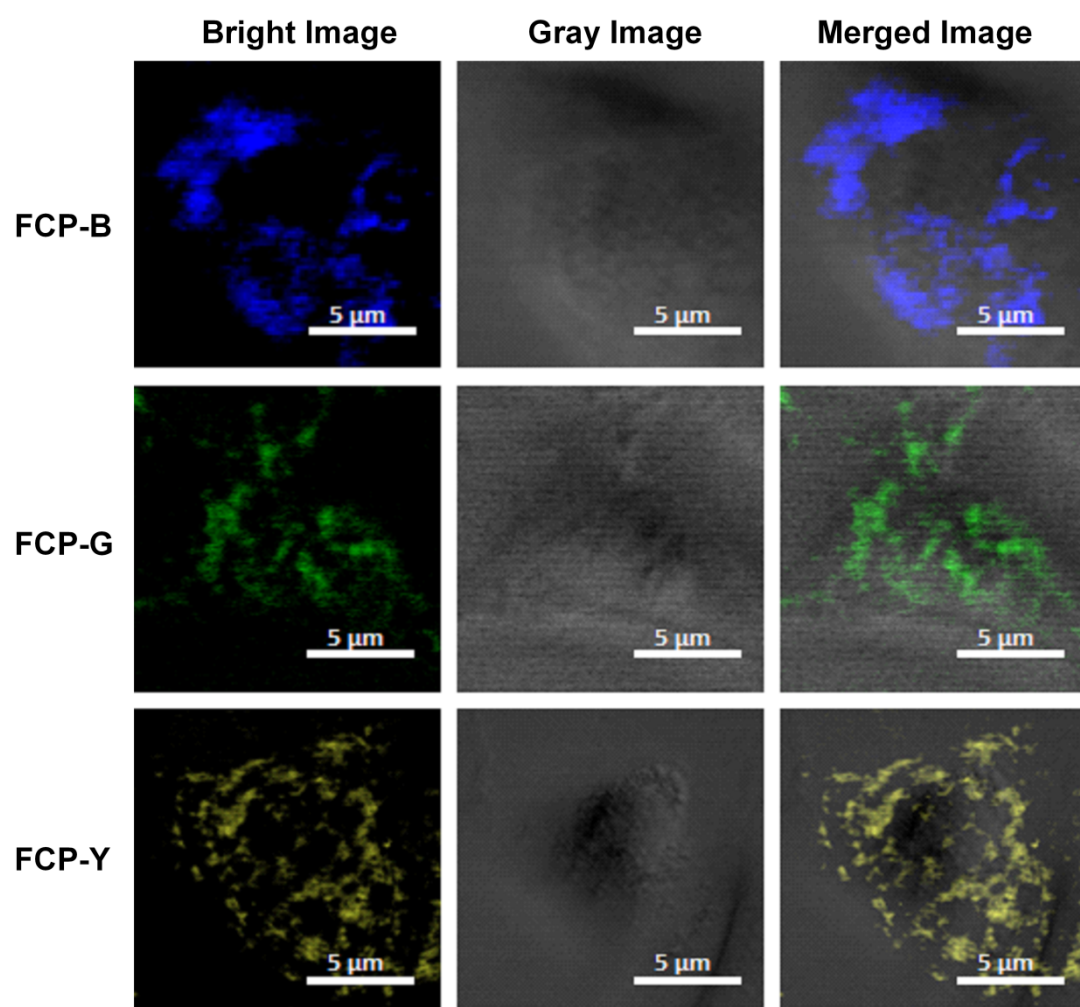

**Fig. S7** Confocal fluorescence microphotograph of A549 cells with FNPs (FCP-B, FCP-G and FCP-Y) at 37 °C for 4 h incubation.

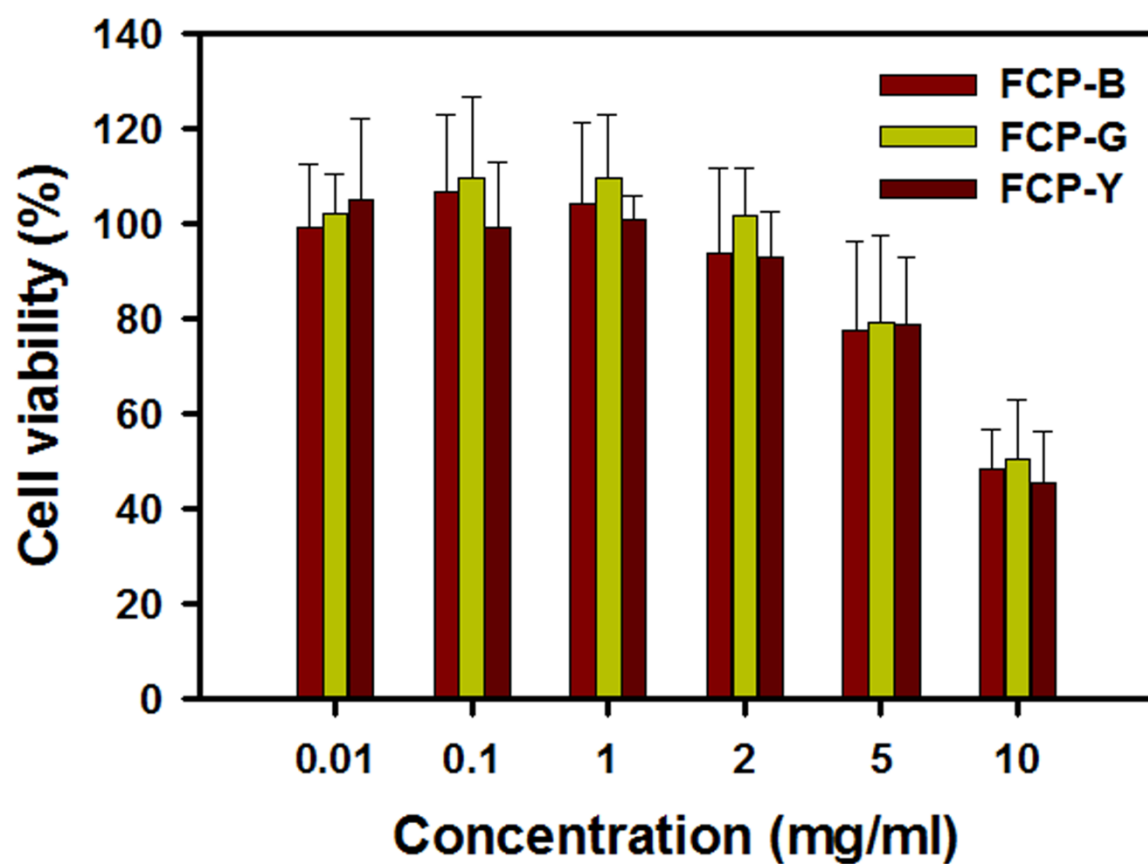

**Fig. S8** MTT assay for *in vitro* cytotoxicity measurement of FCP-B, FCP-G and FCP-Y, respectively, after 24 h of incubation with A549 cells.
